# Supplementary material for: SnO2 hierarchical nanostructure and its strong narrow-band photoluminescence
Source: Royal Society of Chemistry journal article supplement (doi:10.1039/b817530f), 2009-01-01
Supplement: b817530f.pdf [file b817530f.pdf]

**Supporting Information on**

**SnO<sub>2</sub> Hierarchical Nanostructures and its Strong Narrow-Band  
Photoluminescence**

Ming Fang, Xiaoli Tan, Baochang Cheng, Lide Zhang

|                                                                                                                                     |        |
|-------------------------------------------------------------------------------------------------------------------------------------|--------|
| Figure SI-1 Photoluminescence spectra of the sample after 800 °C, 900 °C, 1100 °C, 1200 °C and 1350 °C annealing in the atmosphere. | Page 2 |
| Figure SI-2 XPS survey spectra of the sample after 1000 °C annealing in the atmosphere.                                             | Page 3 |
| Figure SI-3 The Raman spectrum of the tetragonal nanorod, and the inset is the corresponded photograph.                             | Page 4 |

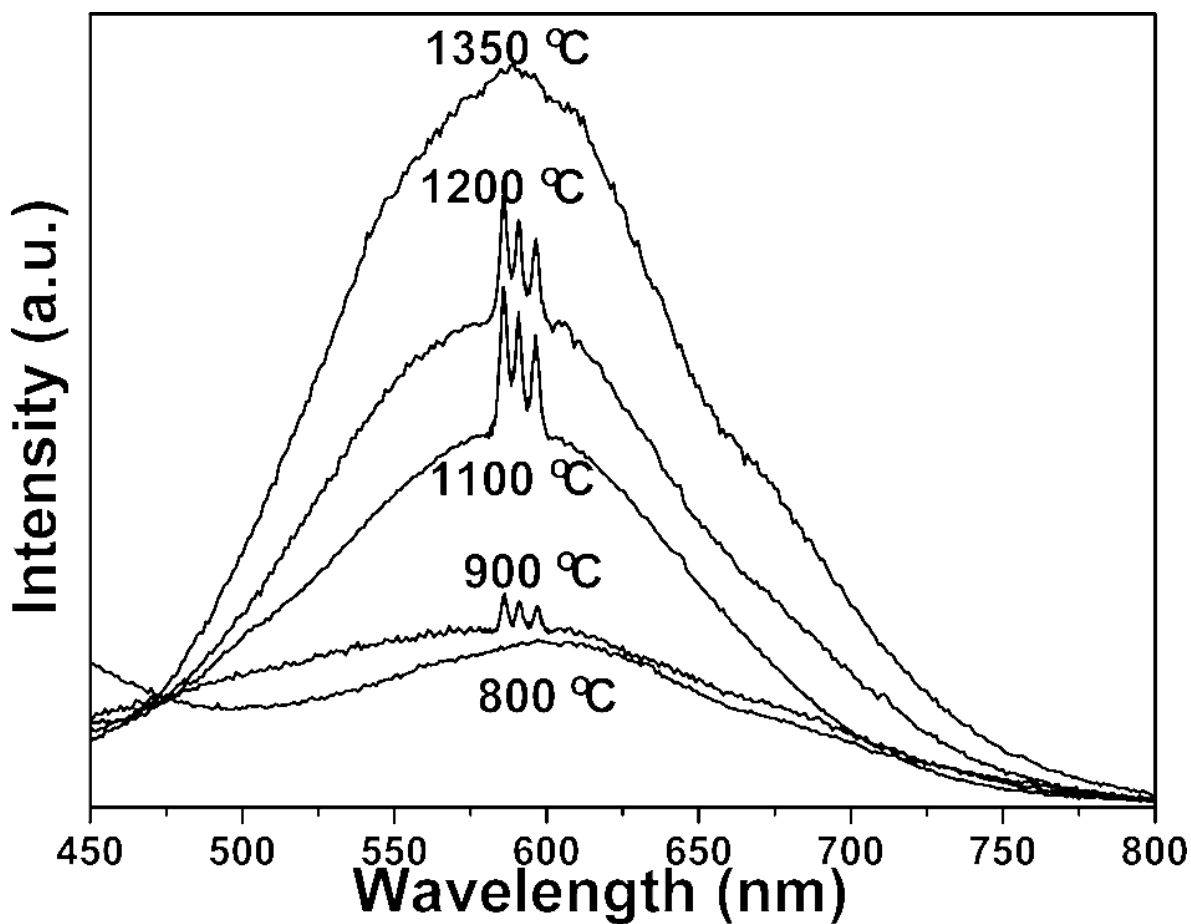

Figure SI-1 Photoluminescence spectra of the sample after 800 °C, 900 °C, 1100 °C, 1200 °C and 1350 °C annealing in the atmosphere.

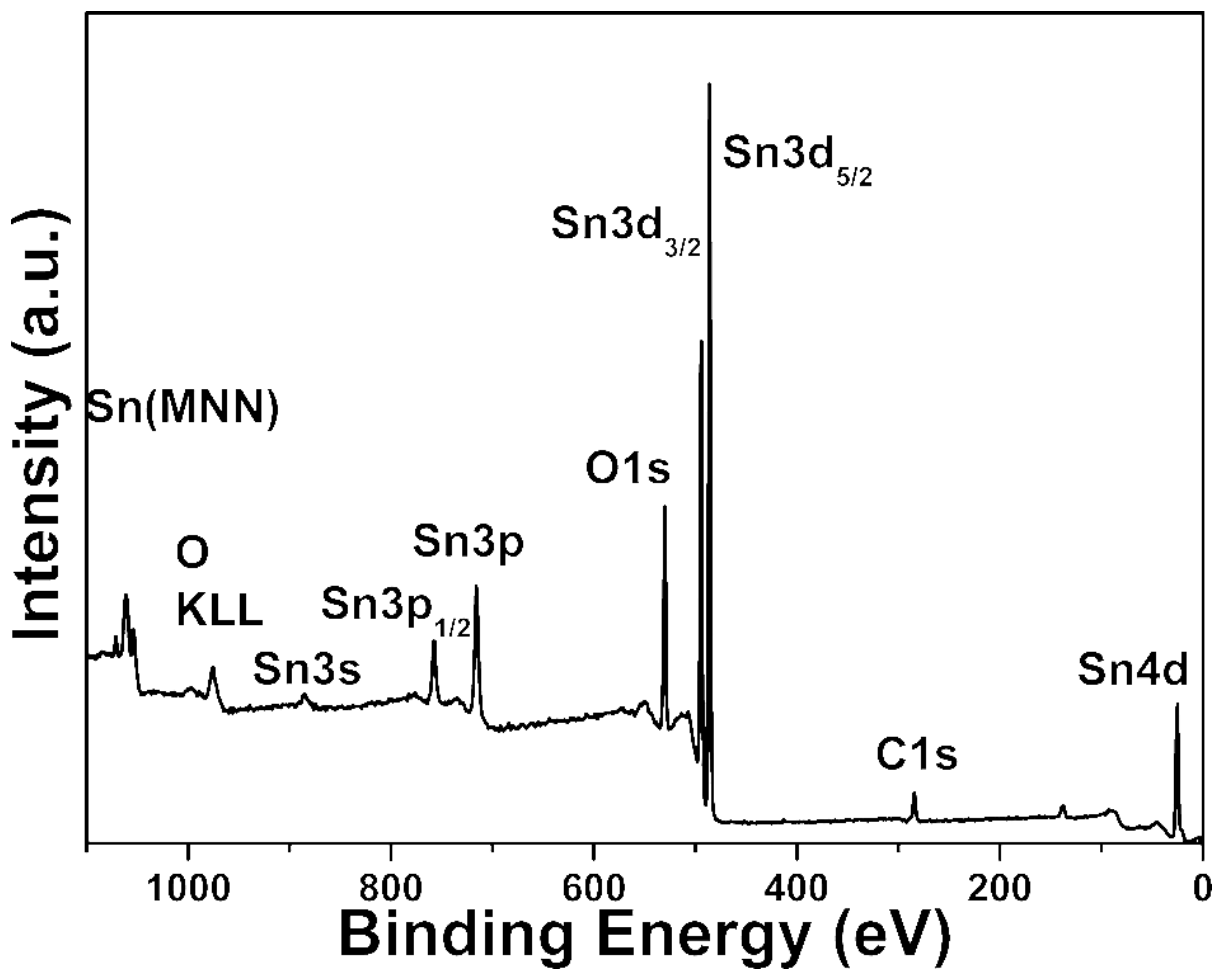

Figure SI-2 XPS survey spectra of the sample after 1000 °C annealing in the atmosphere.

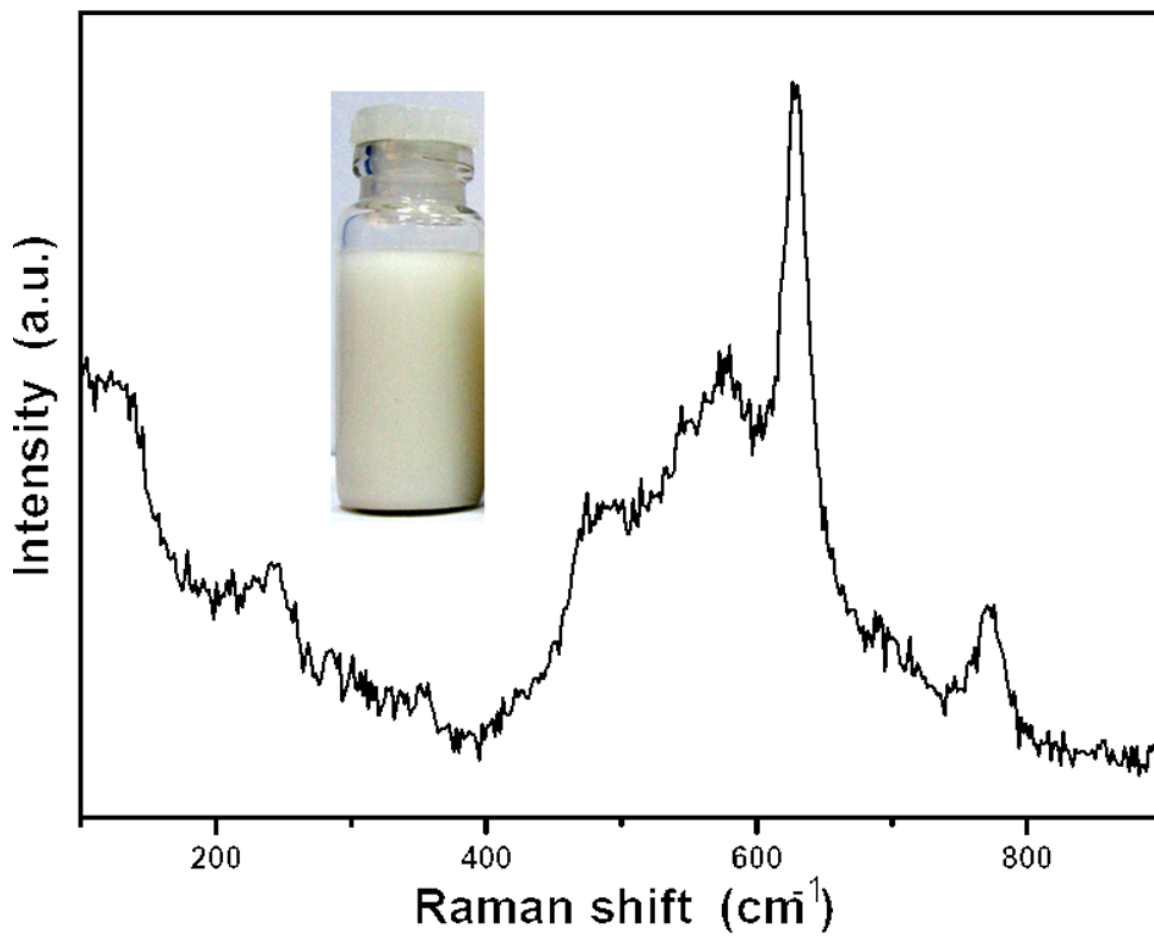

Figure SI-3 The Raman spectrum of the tetragonal nanorod, and the inset is the corresponded photograph.
